# Supplementary material for: Comparative immobilization of labile Pb and Zn fractions in contaminated soil using jackfruit seed-, sugarcane bagasse-, and taro stem-derived biochars: a machine learning-assisted mechanistic elucidation
Source: Royal Society of Chemistry journal article supplement (doi:10.1039/d6ra01444e), 2026-05-06
Supplement: d6ra01444e1.pdf [file d6ra01444e1.pdf]

### Supplementary Information (SI)

**Title: Comparative immobilization of labile Pb and Zn fractions in contaminated soil using jackfruit seed-, sugarcane bagasse-, and taro stem-derived biochars: A machine learning-assisted mechanistic elucidation.**

**Table S1.** Parameter of ICP-MS Agilent 7900 and recovery values of elements in sediment reference material MESS-4

| Operating conditions of ICP-MS Agilent 7900      |                                     |                 |               |
|--------------------------------------------------|-------------------------------------|-----------------|---------------|
| High-Frequency Power (w)                         | ~1600                               |                 |               |
| Sampling depth (mm)                              | ~10                                 |                 |               |
| Carrier gas flow rate (L/min)                    | ~0,7                                |                 |               |
| Auxiliary gas flow rate (L/min)                  | ~0,3                                |                 |               |
| Peristaltic nebulizer (concentric glass)         | MicroMist                           |                 |               |
| Spray chamber temperature (°C)                   | 2                                   |                 |               |
| Helium gas flow rate (mL/min)                    | ~4,3                                |                 |               |
| Hydrogen gas flow rate (mL/min)                  | ~4,2                                |                 |               |
| Peristaltic pump speed                           | 0,1 (0,5 mL/min)                    |                 |               |
| Internal standard                                | <sup>115</sup> In                   |                 |               |
| Isotopes                                         | <sup>208</sup> Pb, <sup>66</sup> Zn |                 |               |
| LOD and LOQ values of metals using ICP-MS        | Element                             | LOD<br>(ng/L)   | LOQ<br>(ng/L) |
|                                                  | Pb                                  | 13.7            | 41.5          |
|                                                  | Zn                                  | 1.5             | 4.5           |
| Recovery values of metal elements (%) for MESS-4 | Element                             | Recovery<br>(%) | RSD<br>(%)    |
|                                                  | Pb                                  | 96.2            | 9.8           |
|                                                  | Zn                                  | 91.8            | 10.4          |

**Table S2.** Two-way ANOVA results for the effects of biochar type and application rate on soil pH, organic carbon (OC), and electrical conductivity (EC) after 1-month incubation.

| Dependent variable                           | Source of variation   | df   | F      | p                      | Significance |
|----------------------------------------------|-----------------------|------|--------|------------------------|--------------|
| <b>pH</b>                                    | Biochar type          | 2/24 | 86.36  | $< 1 \times 10^{-12}$  | ***          |
|                                              | Application rate      | 3/24 | 109.16 | $3.12 \times 10^{-14}$ | ***          |
|                                              | Biochar $\times$ Rate | 6/24 | 47.63  | $< 1 \times 10^{-15}$  | ***          |
| <b>OC (%)</b>                                | Biochar type          | 2/24 | 86.36  | $< 1 \times 10^{-12}$  | ***          |
|                                              | Application rate      | 3/24 | 109.16 | $3.12 \times 10^{-14}$ | ***          |
|                                              | Biochar $\times$ Rate | 6/24 | 28.14  | $1.84 \times 10^{-11}$ | ***          |
| <b>EC (<math>\mu\text{S cm}^{-1}</math>)</b> | Biochar type          | 2/24 | 77.21  | $2.06 \times 10^{-12}$ | ***          |
|                                              | Application rate      | 3/24 | 75.07  | $1.12 \times 10^{-12}$ | ***          |
|                                              | Biochar $\times$ Rate | 6/24 | 18.57  | $2.47 \times 10^{-8}$  | ***          |

**Note.** Two-way ANOVA was performed to evaluate the effects of biochar type and application rate on soil chemical properties. \*, \*\*, and \*\*\* indicate statistical significance at  $p < 0.05$ ,  $p < 0.01$ , and  $p < 0.001$ , respectively.

**Table S3.** Distribution of Pb among Tessier sequential extraction fractions (F1-F5) as affected by biochar type and amendment rate (%) (mean  $\pm$  SD,  $n = 3$ ).

| Treatment | Rate (%) | %F1        | %F2        | %F3        | %F4       | %F5        |
|-----------|----------|------------|------------|------------|-----------|------------|
| BS        | 0        | 11.9 ± 0.6 | 46.5 ± 1.2 | 15.9 ± 0.7 | 2.9 ± 0.3 | 22.9 ± 1.0 |
| SB3       | 3        | 10.2 ± 0.5 | 47.5 ± 1.1 | 16.5 ± 0.6 | 3.8 ± 0.3 | 22.1 ± 0.9 |
| SB5       | 5        | 8.9 ± 0.4  | 50.0 ± 1.3 | 17.3 ± 0.7 | 4.3 ± 0.4 | 19.5 ± 0.8 |
| SB10      | 10       | 7.9 ± 0.4  | 53.6 ± 1.5 | 18.5 ± 0.8 | 4.9 ± 0.4 | 15.2 ± 0.7 |
| JB3       | 3        | 10.6 ± 0.5 | 44.0 ± 1.2 | 16.7 ± 0.7 | 4.1 ± 0.3 | 24.7 ± 1.1 |
| JB5       | 5        | 9.5 ± 0.5  | 45.9 ± 1.1 | 17.5 ± 0.7 | 4.6 ± 0.4 | 22.5 ± 0.9 |
| JB10      | 10       | 8.4 ± 0.4  | 49.2 ± 1.3 | 18.8 ± 0.8 | 5.5 ± 0.5 | 18.1 ± 0.8 |
| TB3       | 3        | 9.0 ± 0.4  | 49.4 ± 1.2 | 16.8 ± 0.7 | 4.3 ± 0.4 | 20.6 ± 0.9 |
| TB5       | 5        | 7.0 ± 0.3  | 51.8 ± 1.4 | 17.6 ± 0.7 | 5.0 ± 0.4 | 18.6 ± 0.8 |
| TB10      | 10       | 5.1 ± 0.3  | 55.5 ± 1.6 | 19.2 ± 0.8 | 5.9 ± 0.5 | 14.3 ± 0.7 |

(Values are presented as mean ± standard deviation ( $n = 3$ ). BS represents Pb/Zn contaminated soil without biochar amendment (control soil or blank soil). SB3 - SB10, JB3 - JB10, and TB3 - TB10 indicate contaminated soils amended with 3%, 5%, and 10% (w/w) of the sugarcane bagasse, jackfruit seed, and taro stem biochars, respectively. All samples were incubated for 30 days.

**Table S4.** Results of two-way ANOVA showing the effects of biochar type, application rate, and their interaction on Pb fractions after 30 days of incubation.

| Pb fraction       | Source of variation | df   | F-value | p-value               | Significance |
|-------------------|---------------------|------|---------|-----------------------|--------------|
| F1 (exchangeable) | Biochar type        | 2/24 | 48.6    | $2.98 \times 10^{-9}$ | ***          |

| <b>Pb fraction</b>            | <b>Source of variation</b> | <b>df</b> | <b>F-value</b> | <b>p-value</b>         | <b>Significance</b> |
|-------------------------------|----------------------------|-----------|----------------|------------------------|---------------------|
|                               | Application rate           | 3/24      | 312.4          | $1 \times 10^{-15}$    | ***                 |
|                               | Biochar $\times$ Rate      | 6/24      | 9.7            | $5.92 \times 10^{-5}$  | ***                 |
| <b>F2 (carbonate-bound)</b>   | Biochar type               | 2/24      | 26.9           | $2.21 \times 10^{-7}$  | ***                 |
|                               | Application rate           | 3/24      | 58.3           | $4.63 \times 10^{-12}$ | ***                 |
|                               | Biochar $\times$ Rate      | 6/24      | 4.2            | 0.00594                | **                  |
| <b>F3 (Fe/Mn oxide-bound)</b> | Biochar type               | 2/24      | 18.4           | $1.15 \times 10^{-5}$  | ***                 |
|                               | Application rate           | 3/24      | 44.7           | $9.64 \times 10^{-11}$ | ***                 |
|                               | Biochar $\times$ Rate      | 6/24      | 3.9            | 0.00836                | **                  |
| <b>F4 (OM-bound)</b>          | Biochar type               | 2/24      | 31.2           | $6.02 \times 10^{-8}$  | ***                 |
|                               | Application rate           | 3/24      | 96.5           | $1.61 \times 10^{-13}$ | ***                 |
|                               | Biochar $\times$ Rate      | 6/24      | 5.6            | 0.00146                | **                  |
| <b>F5 (residual)</b>          | Biochar type               | 2/24      | 42.1           | $7.31 \times 10^{-9}$  | ***                 |
|                               | Application rate           | 3/24      | 287.9          | $1 \times 10^{-15}$    | ***                 |
|                               | Biochar $\times$ Rate      | 6/24      | 11.4           | $1.74 \times 10^{-5}$  | ***                 |

**Notes:** \*, \*\*, and \*\*\* indicate significance at  $p < 0.05$ ,  $p < 0.01$ , and  $p < 0.001$ , respectively; ns = not significant.

**Table S5.** Distribution of Zn among Tessier sequential extraction fractions (F1-F5) as affected by biochar type and amendment rate (%) (mean  $\pm$  SD,  $n = 3$ ).

| <b>Treatment</b> | <b>Rate (%)</b> | <b>%F1</b>     | <b>%F2</b>     | <b>%F3</b>     | <b>%F4</b>    | <b>%F5</b>     |
|------------------|-----------------|----------------|----------------|----------------|---------------|----------------|
| BS               | 0               | $12.9 \pm 0.7$ | $23.7 \pm 1.0$ | $20.5 \pm 0.8$ | $5.2 \pm 0.4$ | $37.7 \pm 1.3$ |

| Treatment | Rate (%) | %F1        | %F2        | %F3        | %F4       | %F5        |
|-----------|----------|------------|------------|------------|-----------|------------|
| SB3       | 3        | 10.7 ± 0.5 | 24.9 ± 1.1 | 21.5 ± 0.9 | 5.1 ± 0.3 | 37.7 ± 1.2 |
| SB5       | 5        | 9.5 ± 0.5  | 25.7 ± 1.2 | 22.4 ± 0.9 | 4.9 ± 0.3 | 37.5 ± 1.1 |
| SB10      | 10       | 8.4 ± 0.4  | 26.7 ± 1.3 | 23.5 ± 1.0 | 4.6 ± 0.3 | 36.8 ± 1.0 |
| JB3       | 3        | 9.5 ± 0.5  | 25.7 ± 1.1 | 21.3 ± 0.9 | 4.5 ± 0.3 | 39.1 ± 1.4 |
| JB5       | 5        | 8.6 ± 0.4  | 26.3 ± 1.2 | 22.1 ± 0.9 | 4.2 ± 0.3 | 38.7 ± 1.3 |
| JB10      | 10       | 7.5 ± 0.4  | 27.3 ± 1.3 | 23.3 ± 1.0 | 3.9 ± 0.2 | 38.0 ± 1.2 |
| TB3       | 3        | 10.1 ± 0.5 | 25.4 ± 1.1 | 22.2 ± 0.9 | 5.6 ± 0.4 | 36.8 ± 1.1 |
| TB5       | 5        | 8.9 ± 0.4  | 26.1 ± 1.2 | 23.1 ± 1.0 | 5.3 ± 0.4 | 36.6 ± 1.1 |
| TB10      | 10       | 7.8 ± 0.4  | 27.1 ± 1.3 | 24.4 ± 1.0 | 5.0 ± 0.3 | 35.7 ± 1.0 |

(Values are presented as mean ± standard deviation (n = 3). BS represents Pb/Zn contaminated soil without biochar amendment (control soil or blank soil). SB3 - SB10, JB3 - JB10, and TB3 - TB10 indicate contaminated soils amended with 3%, 5%, and 10% (w/w) of the sugarcane bagasse, jackfruit seed, and taro stem biochars, respectively. All samples were incubated for 30 days.

**Table S6.** Results of two-way ANOVA showing the effects of biochar type, application rate, and their interaction on Zn fractions after 30 days of incubation.

| Zn fraction       | Source of variation | df   | F     | p-value                | Sig |
|-------------------|---------------------|------|-------|------------------------|-----|
| F1 (exchangeable) | Biochar type        | 2/24 | 36.8  | $2.21 \times 10^{-8}$  | *** |
|                   | Application rate    | 3/24 | 214.5 | $1.01 \times 10^{-15}$ | *** |

| <b>Zn fraction</b>            | <b>Source of variation</b> | <b>df</b> | <b>F</b> | <b>p-value</b>         | <b>Sig</b> |
|-------------------------------|----------------------------|-----------|----------|------------------------|------------|
| <b>F2 (carbonate-bound)</b>   | Biochar × Rate             | 6/24      | 7.9      | $1.73 \times 10^{-4}$  | ***        |
|                               | Biochar type               | 2/24      | 14.6     | $6.52 \times 10^{-5}$  | ***        |
|                               | Application rate           | 3/24      | 22.3     | $1.14 \times 10^{-7}$  | ***        |
| <b>F3 (Fe/Mn oxide-bound)</b> | Biochar × Rate             | 6/24      | 3.1      | 0.0192                 | *          |
|                               | Biochar type               | 2/24      | 19.8     | $5.03 \times 10^{-6}$  | ***        |
|                               | Application rate           | 3/24      | 41.6     | $3.27 \times 10^{-10}$ | ***        |
| <b>F4 (OM-bound)</b>          | Biochar × Rate             | 6/24      | 2.8      | 0.0318                 | *          |
|                               | Biochar type               | 2/24      | 28.4     | $1.12 \times 10^{-7}$  | ***        |
|                               | Application rate           | 3/24      | 64.9     | $2.08 \times 10^{-12}$ | ***        |
| <b>F5 (residual)</b>          | Biochar × Rate             | 6/24      | 4.9      | 0.0016                 | **         |
|                               | Biochar type               | 2/24      | 21.7     | $2.64 \times 10^{-6}$  | ***        |
|                               | Application rate           | 3/24      | 97.5     | $4.51 \times 10^{-14}$ | ***        |
|                               | Biochar × Rate             | 6/24      | 6.2      | $4.87 \times 10^{-4}$  | ***        |

**Notes:** \*, \*\*, and \*\*\* indicate significance at  $p < 0.05$ ,  $p < 0.01$ , and  $p < 0.001$ , respectively; ns = not significant.

**Table S7.** Machine learning input dataset for predicting the distribution of Pb and Zn among geochemical fractions (F1–F5) in biochar-amended soils. The dataset includes soil physicochemical properties (pH, organic carbon, and electrical conductivity), biochar characteristics (type, application rate, and pH), and metal type as predictor variables.

| Nr | Sample | Biochar | Rate (%) | Metal | pH_soil | OC_soil (%) | EC_soil ( $\mu\text{S}/\text{cm}$ ) | F1 (%) | F2 (%) | F3 (%) | F4 (%) | F5 (%) |
|----|--------|---------|----------|-------|---------|-------------|-------------------------------------|--------|--------|--------|--------|--------|
| 1  | BS     | None    | 0        | Pb    | 6.84    | 2.36        | 52                                  | 11.9   | 46.5   | 15.9   | 2.9    | 22.9   |
| 2  | BS     | None    | 0        | Zn    | 6.84    | 2.36        | 52                                  | 12.9   | 23.7   | 20.5   | 5.2    | 37.7   |
| 3  | SB3    | SB      | 3        | Pb    | 7.02    | 2.92        | 76                                  | 10.2   | 47.5   | 16.5   | 3.8    | 22.1   |
| 4  | SB3    | SB      | 3        | Zn    | 7.02    | 2.92        | 76                                  | 10.7   | 24.9   | 21.5   | 5.1    | 37.7   |
| 5  | SB5    | SB      | 5        | Pb    | 7.16    | 3.28        | 98                                  | 8.9    | 50.0   | 17.3   | 4.3    | 19.5   |
| 6  | SB5    | SB      | 5        | Zn    | 7.16    | 3.28        | 98                                  | 9.5    | 25.7   | 22.4   | 4.9    | 37.5   |
| 7  | SB10   | SB      | 10       | Pb    | 7.34    | 3.82        | 138                                 | 7.9    | 53.6   | 18.5   | 4.9    | 15.2   |
| 8  | SB10   | SB      | 10       | Zn    | 7.34    | 3.82        | 138                                 | 8.4    | 26.7   | 23.5   | 4.6    | 36.8   |
| 9  | JB3    | JB      | 3        | Pb    | 7.08    | 2.78        | 74                                  | 10.6   | 44.0   | 16.7   | 4.1    | 24.7   |
| 10 | JB3    | JB      | 3        | Zn    | 7.08    | 2.78        | 74                                  | 9.5    | 25.7   | 21.3   | 4.5    | 39.1   |
| 11 | JB5    | JB      | 5        | Pb    | 7.20    | 3.02        | 96                                  | 9.5    | 45.9   | 17.5   | 4.6    | 22.5   |
| 12 | JB5    | JB      | 5        | Zn    | 7.20    | 3.02        | 96                                  | 8.6    | 26.3   | 22.1   | 4.2    | 38.7   |
| 13 | JB10   | JB      | 10       | Pb    | 7.36    | 3.46        | 132                                 | 8.4    | 49.2   | 18.8   | 5.5    | 18.1   |
| 14 | JB10   | JB      | 10       | Zn    | 7.36    | 3.46        | 132                                 | 7.5    | 27.3   | 23.3   | 3.9    | 38.0   |
| 15 | TB3    | TB      | 3        | Pb    | 7.15    | 2.60        | 118                                 | 9.0    | 49.4   | 16.8   | 4.3    | 20.6   |
| 16 | TB3    | TB      | 3        | Zn    | 7.15    | 2.60        | 118                                 | 10.1   | 25.4   | 22.2   | 5.6    | 36.8   |
| 17 | TB5    | TB      | 5        | Pb    | 7.15    | 2.60        | 165                                 | 7.0    | 51.8   | 17.6   | 5.0    | 18.6   |
| 18 | TB5    | TB      | 5        | Zn    | 7.15    | 2.60        | 165                                 | 8.9    | 26.1   | 23.1   | 5.3    | 36.6   |
| 19 | TB10   | TB      | 10       | Pb    | 7.55    | 3.05        | 240                                 | 5.1    | 55.5   | 19.2   | 5.9    | 14.3   |
| 20 | TB10   | TB      | 10       | Zn    | 7.55    | 3.05        | 240                                 | 7.8    | 27.1   | 24.4   | 5.0    | 35.7   |

**Table S8.** *Input dataset for machine learning models predicting Pb concentrations ( $\text{mg kg}^{-1}$ ) in geochemical fractions (F1–F5) based on soil properties and biochar application parameters.*

| Sample | Biochar | Rate (%) | pH_soil | OC_soil (%) | EC_soil ( $\mu\text{S/cm}$ ) | F1 (mg/kg) | F2 (mg/kg) | F3 (mg/kg) | F4 (mg/kg) | F5 (mg/kg) |
|--------|---------|----------|---------|-------------|------------------------------|------------|------------|------------|------------|------------|
| BS     | None    | 0        | 6.84    | 2.36        | 52                           | 464.6      | 1822.9     | 622.6      | 113.4      | 896.5      |
| SB3    | SB      | 3        | 7.02    | 2.92        | 76                           | 387.5      | 1810.4     | 630.1      | 144.3      | 842.7      |
| SB5    | SB      | 5        | 7.16    | 3.28        | 98                           | 331.8      | 1862.9     | 644.5      | 159.6      | 727.2      |
| SB10   | SB      | 10       | 7.34    | 3.82        | 138                          | 280.6      | 1909.8     | 659.7      | 174.6      | 541.4      |
| JB3    | JB      | 3        | 7.08    | 2.78        | 74                           | 402.1      | 1676.3     | 634.9      | 155.8      | 939.1      |
| JB5    | JB      | 5        | 7.20    | 3.02        | 96                           | 354.6      | 1712.8     | 651.6      | 171.9      | 840.6      |
| JB10   | JB      | 10       | 7.36    | 3.46        | 132                          | 299.4      | 1756.2     | 670.1      | 194.7      | 645.5      |
| TB3    | TB      | 3        | 7.15    | 2.60        | 118                          | 343.8      | 1882.7     | 639.4      | 162.6      | 783.5      |
| TB5    | TB      | 5        | 7.15    | 2.60        | 165                          | 260.5      | 1932.4     | 657.8      | 187.9      | 692.4      |
| TB10   | TB      | 10       | 7.55    | 3.05        | 240                          | 182.6      | 1979.8     | 684.9      | 211.6      | 509.2      |

**Table S9.** *Input dataset for machine learning models predicting Zn concentrations ( $\text{mg kg}^{-1}$ ) in geochemical fractions (F1–F5) based on soil properties and biochar application parameters.*

| Sample | Biochar | Rate (%) | pH_soil | OC_soil (%) | EC_soil ( $\mu\text{S/cm}$ ) | F1 (mg/kg) | F2 (mg/kg) | F3 (mg/kg) | F4 (mg/kg) | F5 (mg/kg) |
|--------|---------|----------|---------|-------------|------------------------------|------------|------------|------------|------------|------------|
| BS     | None    | 0        | 6.84    | 2.36        | 52                           | 230.5      | 424.6      | 366.7      | 93.1       | 675.1      |

| <b>Sample</b> | <b>Biochar</b> | <b>Rate (%)</b> | <b>pH_soil</b> | <b>OC_soil (%)</b> | <b>EC_soil (<math>\mu</math>S/cm)</b> | <b>F1 (mg/kg)</b> | <b>F2 (mg/kg)</b> | <b>F3 (mg/kg)</b> | <b>F4 (mg/kg)</b> | <b>F5 (mg/kg)</b> |
|---------------|----------------|-----------------|----------------|--------------------|---------------------------------------|-------------------|-------------------|-------------------|-------------------|-------------------|
| SB3           | SB             | 3               | 7.02           | 2.92               | 76                                    | 185.6             | 432.7             | 374.5             | 89.3              | 655.8             |
| SB5           | SB             | 5               | 7.16           | 3.28               | 98                                    | 162.3             | 438.1             | 382.9             | 83.4              | 641.2             |
| SB10          | SB             | 10              | 7.34           | 3.82               | 138                                   | 139.8             | 444.5             | 391.6             | 76.9              | 612.4             |
| JB3           | JB             | 3               | 7.08           | 2.78               | 74                                    | 158.4             | 429.6             | 356.1             | 74.8              | 653.2             |
| JB5           | JB             | 5               | 7.20           | 3.02               | 96                                    | 142.6             | 435.2             | 364.7             | 69.5              | 640.1             |
| JB10          | JB             | 10              | 7.36           | 3.46               | 132                                   | 121.3             | 441.8             | 375.9             | 62.4              | 614.6             |
| TB3           | TB             | 3               | 7.15           | 2.60               | 118                                   | 176.9             | 446.3             | 391.4             | 98.5              | 646.8             |
| TB5           | TB             | 5               | 7.15           | 2.60               | 165                                   | 154.2             | 451.7             | 399.6             | 91.2              | 633.1             |
| TB10          | TB             | 10              | 7.55           | 3.05               | 240                                   | 131.6             | 458.4             | 412.8             | 83.7              | 602.9             |

**Table S10.** Performance of machine learning models for predicting Pb and Zn concentrations in different Tessier fractions.

| <b>Metal</b> | <b>Fraction</b> | <b>Model</b> | <b>RMSE</b>  | <b>MAE</b>   | <b>R<sup>2</sup></b> |
|--------------|-----------------|--------------|--------------|--------------|----------------------|
| <b>Pb</b>    | F1              | RF           | 36.88        | 30.48        | 0.776                |
|              | F1              | XGB          | <b>34.60</b> | <b>28.68</b> | <b>0.800</b>         |
|              | F2              | RF           | 118.85       | 96.72        | 0.045                |
|              | F2              | XGB          | 139.13       | 116.91       | 0.039                |
|              | F3              | RF           | <b>28.78</b> | <b>22.24</b> | <b>0.240</b>         |
|              | F3              | XGB          | 32.57        | 25.89        | 0.185                |
|              | F4              | RF           | 18.64        | 14.80        | 0.621                |
|              | F4              | XGB          | <b>18.32</b> | <b>14.09</b> | <b>0.658</b>         |
|              | F5              | RF           | 52.51        | 47.68        | 0.843                |
|              | F5              | XGB          | <b>50.69</b> | <b>39.34</b> | <b>0.849</b>         |
| <b>Zn</b>    | F1              | RF           | <b>23.62</b> | <b>18.59</b> | <b>0.556</b>         |
|              | F1              | XGB          | 26.75        | 22.23        | 0.474                |
|              | F2              | RF           | 26.68        | 21.41        | 0.074                |
|              | F2              | XGB          | <b>23.94</b> | <b>18.81</b> | <b>0.255</b>         |
|              | F3              | RF           | 27.25        | <b>20.92</b> | 0.134                |
|              | F3              | XGB          | 27.26        | 21.93        | <b>0.203</b>         |
|              | F4              | RF           | 8.77         | 7.72         | 0.429                |
|              | F4              | XGB          | <b>8.43</b>  | <b>7.03</b>  | <b>0.474</b>         |
|              | F5              | RF           | <b>17.96</b> | <b>14.54</b> | <b>0.409</b>         |
|              | F5              | XGB          | 20.60        | 16.98        | 0.292                |

**Note:** RF denotes Random Forest, and XGB denotes Extreme Gradient Boosting. RMSE (root mean square error) and MAE (mean absolute error) represent model prediction errors, with lower values indicating higher predictive accuracy. The coefficient of determination ( $R^2$ ) reflects the proportion of variance in the observed data explained by the model, where values closer to 1 indicate superior model performance. F1-F5 correspond to the chemical fractions obtained using the Tessier sequential extraction procedure: F1, exchangeable fraction; F2, carbonate-bound fraction; F3, Fe-Mn oxide-bound fraction; F4, organic matter/sulfide-bound fraction; and F5, residual fraction. Values shown in **bold** indicate the best-performing model for each metal fraction, based on a combined evaluation of RMSE, MAE, and  $R^2$ . dataset: 30 observations.

**Table 11. Feature importance of environmental variables controlling Pb distribution among Tessier fractions (F1–F5) predicted by RF and XGB models**

**(a) Random Forest (RF)**

| <b>Fraction</b> | <b>Rank</b> | <b>Feature</b> | <b>Importance score</b> |
|-----------------|-------------|----------------|-------------------------|
| <b>F1</b>       | 1           | EC             | 52 734.35               |
|                 | 2           | pH             | 46 459.18               |
|                 | 3           | Rate           | 31 747.65               |
|                 | 4           | OC             | 26 656.74               |
| <b>F2</b>       | 1           | EC             | 103 461.67              |
|                 | 2           | pH             | 90 992.84               |
|                 | 3           | OC             | 77 415.18               |
|                 | 4           | Rate           | 34 739.26               |
| <b>F3</b>       | 1           | pH             | 6 986.82                |
|                 | 2           | EC             | 6 918.78                |
|                 | 3           | OC             | 6 541.76                |
|                 | 4           | Rate           | 4 923.19                |
| <b>F4</b>       | 1           | pH             | 6 538.26                |
|                 | 2           | EC             | 6 389.89                |
|                 | 3           | OC             | 6 073.56                |
|                 | 4           | Rate           | 5 003.90                |
| <b>F5</b>       | 1           | EC             | 134 917.88              |
|                 | 2           | pH             | 121 481.27              |
|                 | 3           | Rate           | 116 383.43              |
|                 | 4           | OC             | 88 274.38               |

Feature importance scores were obtained from Random Forest (RF) (mean decrease in impurity) and XGBoost (XGB) (gain). Larger values indicate stronger contribution to Pb fraction prediction.

**(b) XGBoost (XGB)**

| <b>Fraction</b> | <b>Rank</b> | <b>Feature</b> | <b>Gain</b> |
|-----------------|-------------|----------------|-------------|
| <b>F1</b>       | 1           | EC             | 0.677       |
|                 | 2           | pH             | 0.242       |
|                 | 3           | OC             | 0.072       |
|                 | 4           | Rate           | 0.009       |
| <b>F2</b>       | 1           | EC             | 0.387       |
|                 | 2           | pH             | 0.344       |
|                 | 3           | OC             | 0.245       |
|                 | 4           | Rate           | 0.024       |
| <b>F3</b>       | 1           | pH             | 0.445       |
|                 | 2           | OC             | 0.249       |

| <b>Fraction</b> | <b>Rank</b> | <b>Feature</b> | <b>Gain</b> |
|-----------------|-------------|----------------|-------------|
| <b>F4</b>       | 3           | EC             | 0.237       |
|                 | 4           | Rate           | 0.069       |
|                 | 1           | pH             | 0.420       |
|                 | 2           | Rate           | 0.237       |
|                 | 3           | EC             | 0.175       |
| <b>F5</b>       | 4           | OC             | 0.168       |
|                 | 1           | EC             | 0.489       |
|                 | 2           | pH             | 0.394       |
|                 | 3           | OC             | 0.091       |
|                 | 4           | Rate           | 0.026       |

**Table 12. Feature importance of environmental variables controlling Zn distribution among Tessier fractions (F1–F5) predicted by RF and XGB models**

Feature importance scores were derived from Random Forest (RF) (mean decrease in impurity) and XGBoost (XGB) (gain). Higher values indicate stronger influence on Zn fraction prediction.

**(a) Random Forest (RF)**

| Fraction  | Rank | Feature | Importance score |
|-----------|------|---------|------------------|
| <b>F1</b> | 1    | pH      | 8866.85          |
|           | 2    | OC      | 8616.17          |
|           | 3    | EC      | 8094.50          |
|           | 4    | Rate    | 7130.26          |
| <b>F2</b> | 1    | EC      | 6647.00          |
|           | 2    | OC      | 4744.27          |
|           | 3    | pH      | 3916.44          |
|           | 4    | Rate    | 1631.55          |
| <b>F3</b> | 1    | EC      | 7237.76          |
|           | 2    | pH      | 5383.37          |
|           | 3    | OC      | 4761.08          |
|           | 4    | Rate    | 2456.18          |
| <b>F4</b> | 1    | OC      | 1108.34          |
|           | 2    | pH      | 853.29           |
|           | 3    | EC      | 717.26           |
|           | 4    | Rate    | 598.46           |
| <b>F5</b> | 1    | pH      | 3897.79          |
|           | 2    | OC      | 3481.12          |
|           | 3    | EC      | 3124.13          |
|           | 4    | Rate    | 2992.66          |

**(b) XGBoost (XGB)**

| Fraction  | Rank | Feature | Gain  |
|-----------|------|---------|-------|
| <b>F1</b> | 1    | pH      | 0.421 |
|           | 2    | Rate    | 0.273 |
|           | 3    | OC      | 0.253 |
|           | 4    | EC      | 0.053 |
| <b>F2</b> | 1    | EC      | 0.494 |
|           | 2    | pH      | 0.250 |
|           | 3    | OC      | 0.229 |
|           | 4    | Rate    | 0.027 |
| <b>F3</b> | 1    | EC      | 0.457 |
|           | 2    | pH      | 0.282 |
|           | 3    | OC      | 0.249 |
|           | 4    | Rate    | 0.011 |
| <b>F4</b> | 1    | OC      | 0.606 |
|           | 2    | pH      | 0.212 |
|           | 3    | EC      | 0.128 |
|           | 4    | Rate    | 0.053 |

| <b>Fraction</b> | <b>Rank</b> | <b>Feature</b> | <b>Gain</b> |
|-----------------|-------------|----------------|-------------|
| <b>F5</b>       | 1           | OC             | 0.330       |
|                 | 2           | pH             | 0.324       |
|                 | 3           | EC             | 0.219       |
|                 | 4           | Rate           | 0.128       |

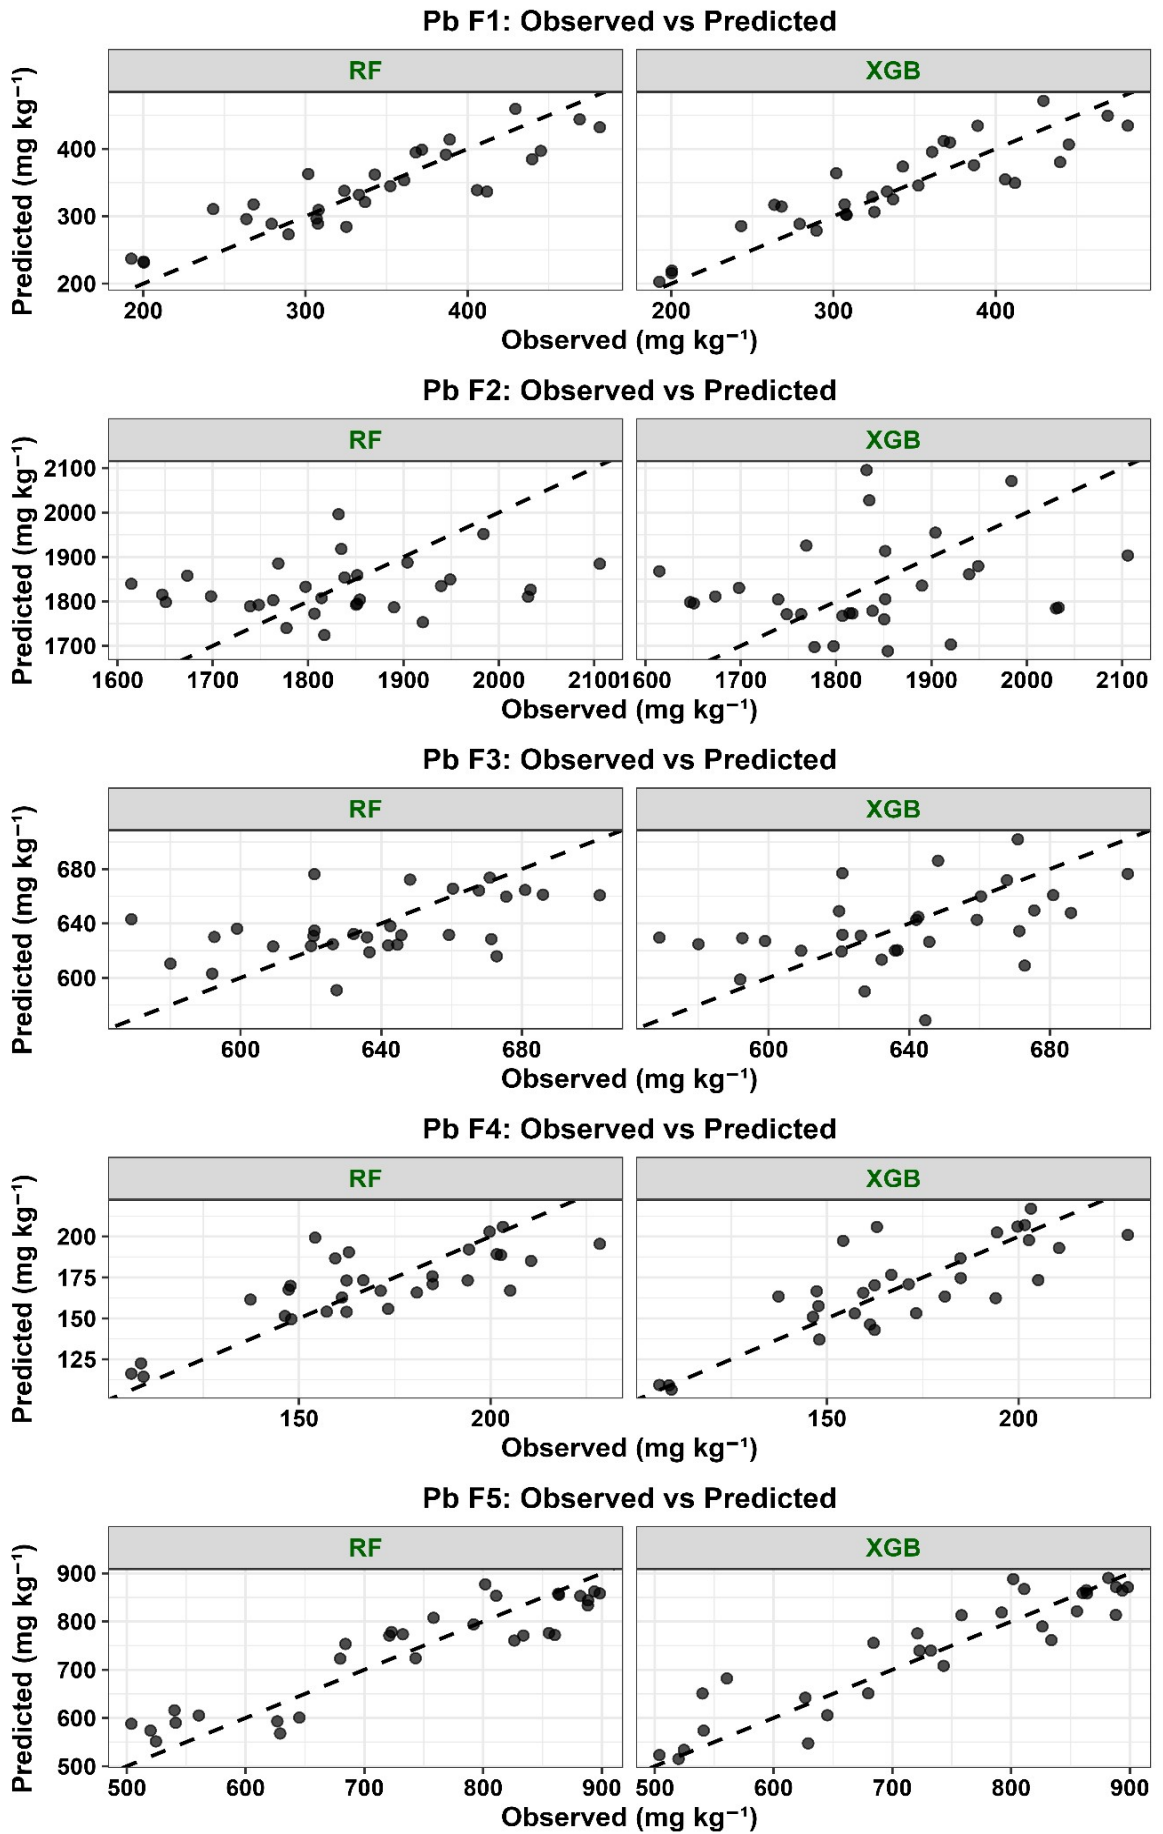

Figure S1. Observed and predicted of Pb fractions (F1-F5)

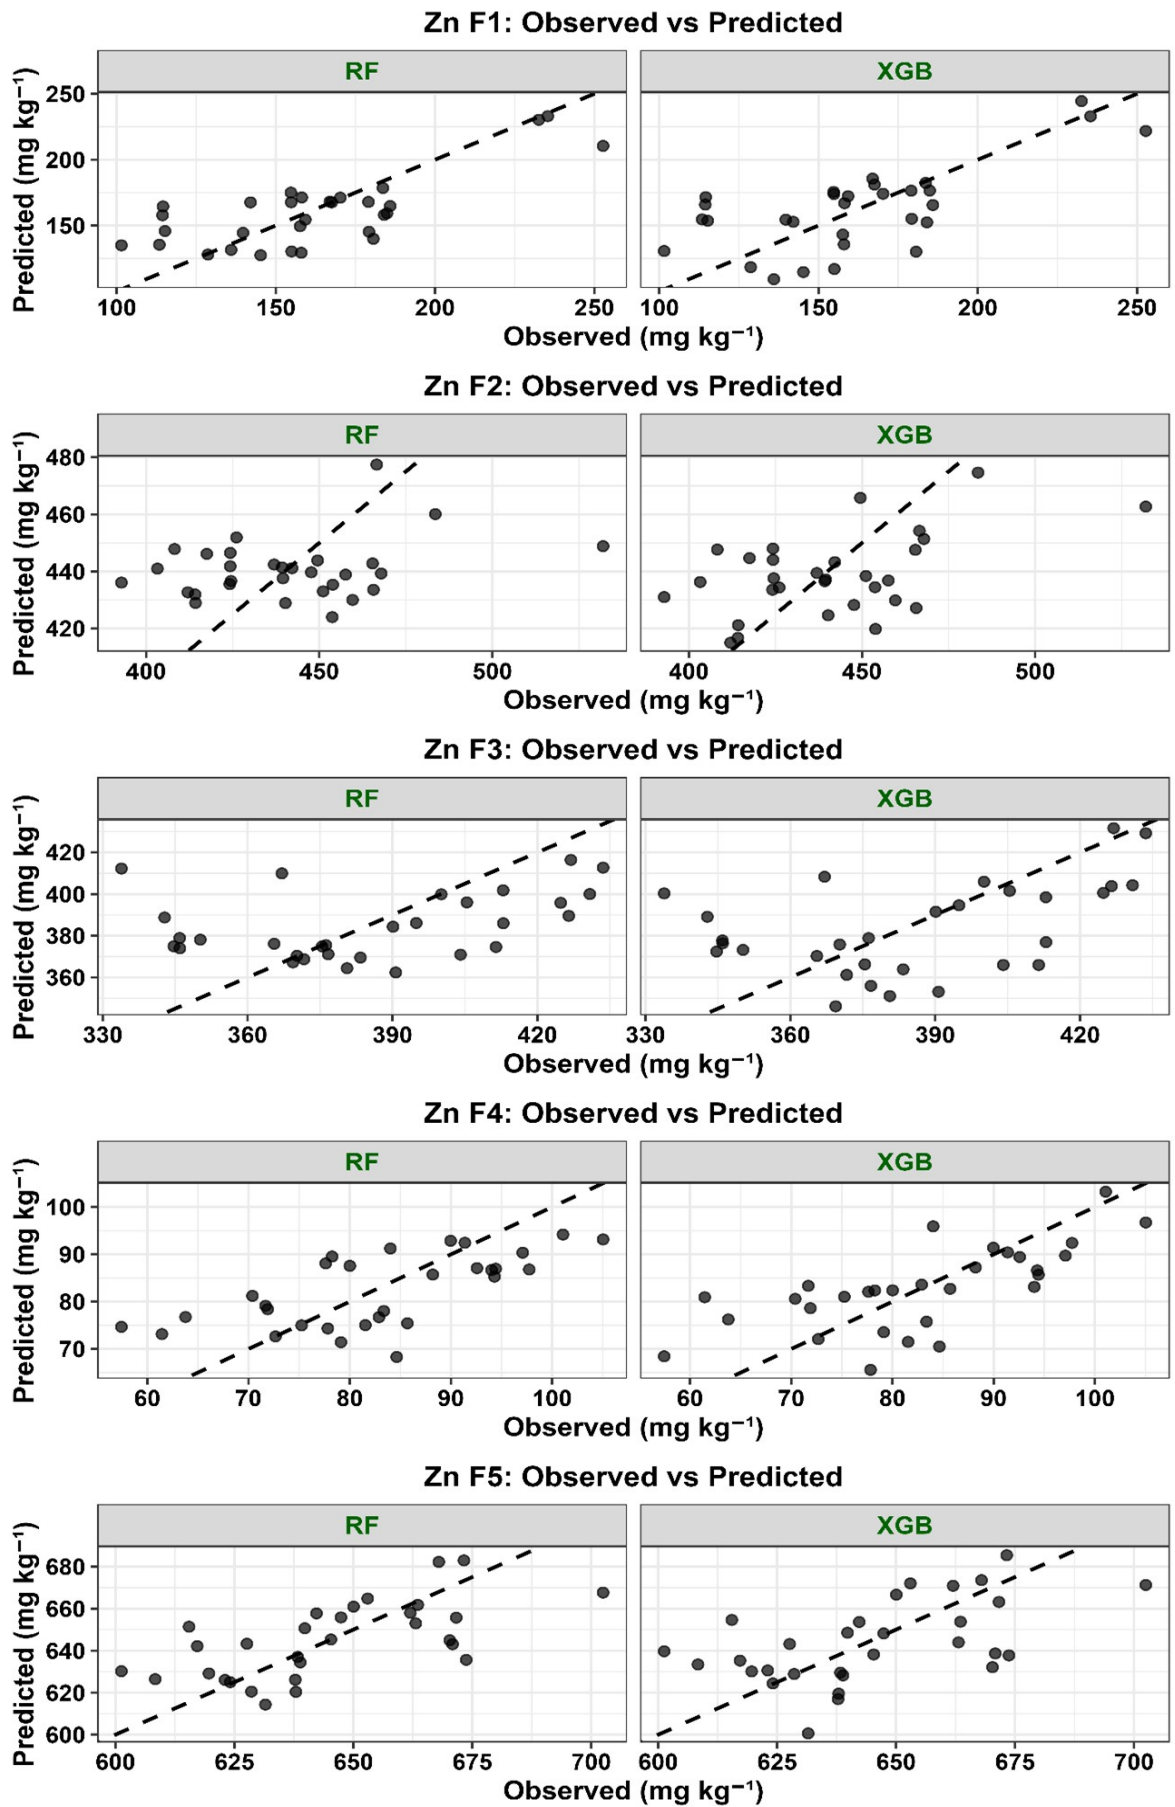

Figure S2. Observed and predicted of Zn fractions (F1-F5)

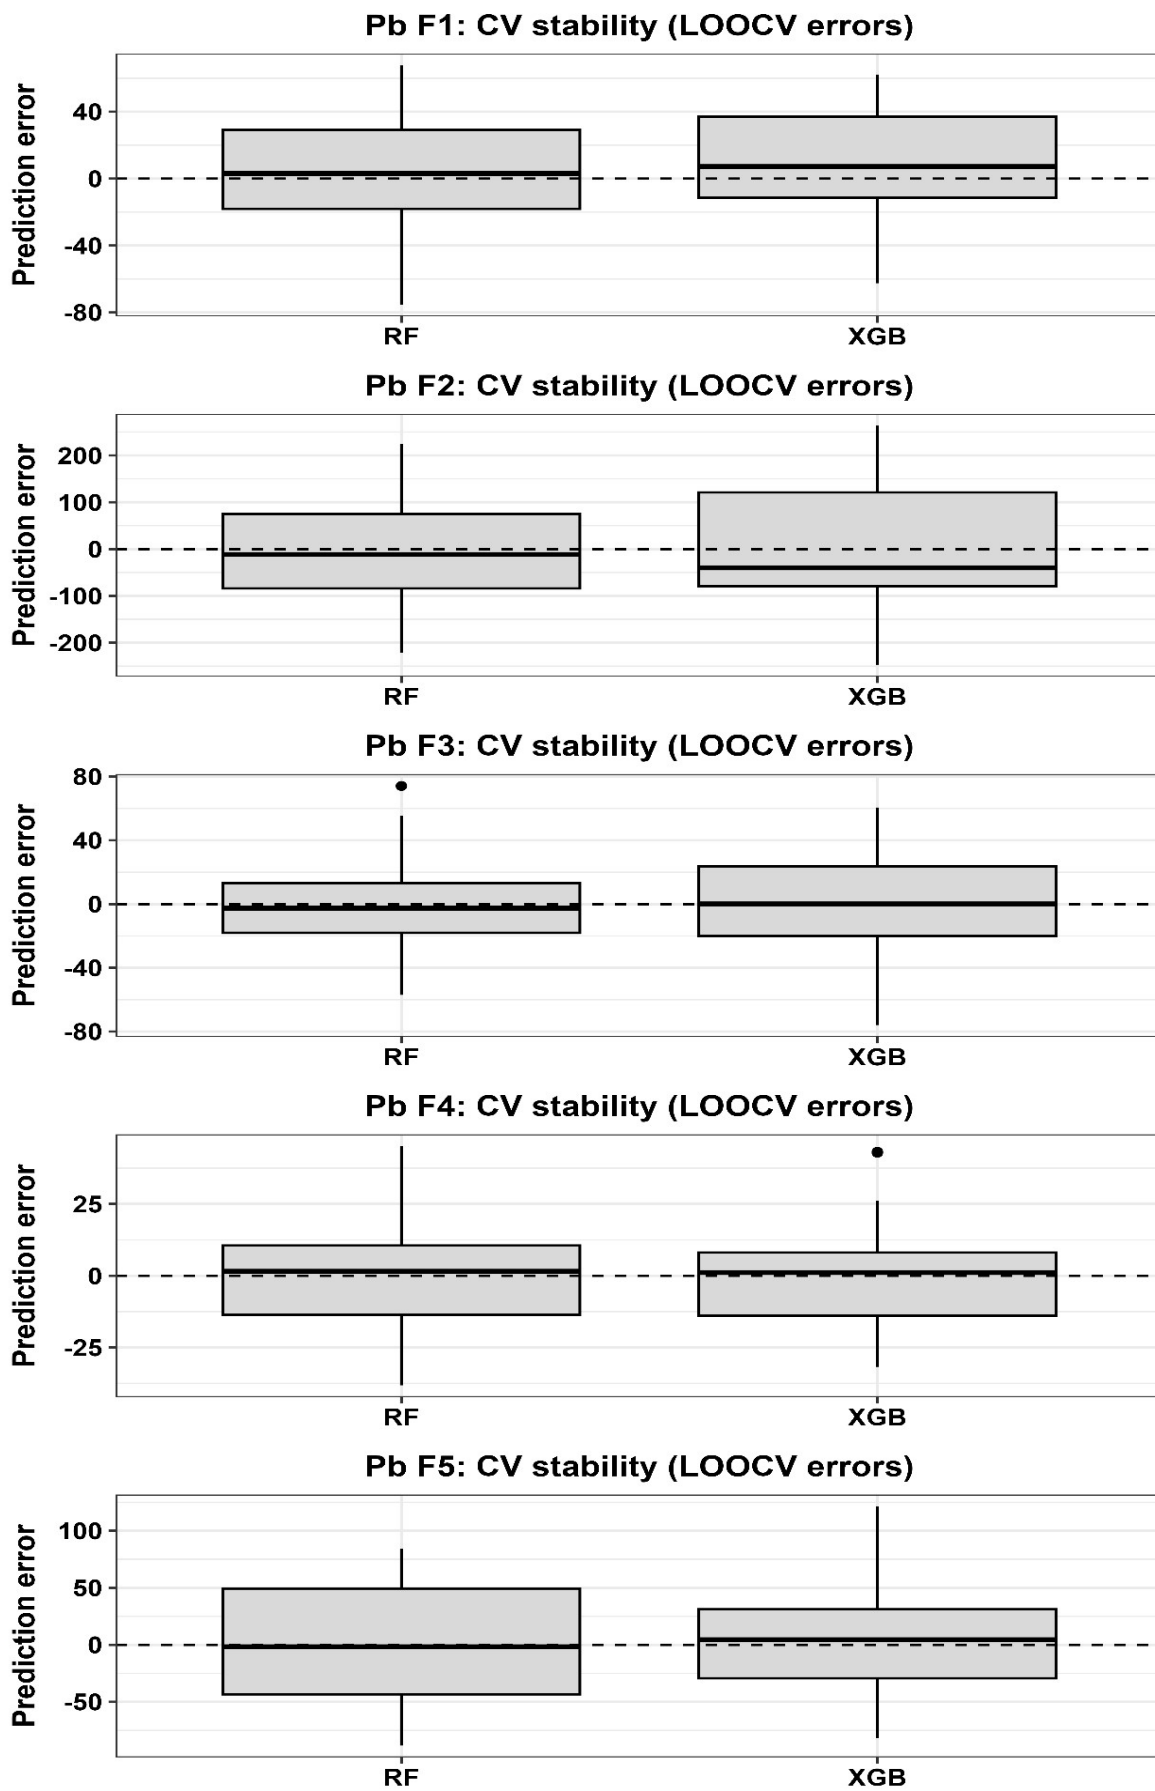

**Figure S3. CV stability of Pb fractions (F1-F5)**

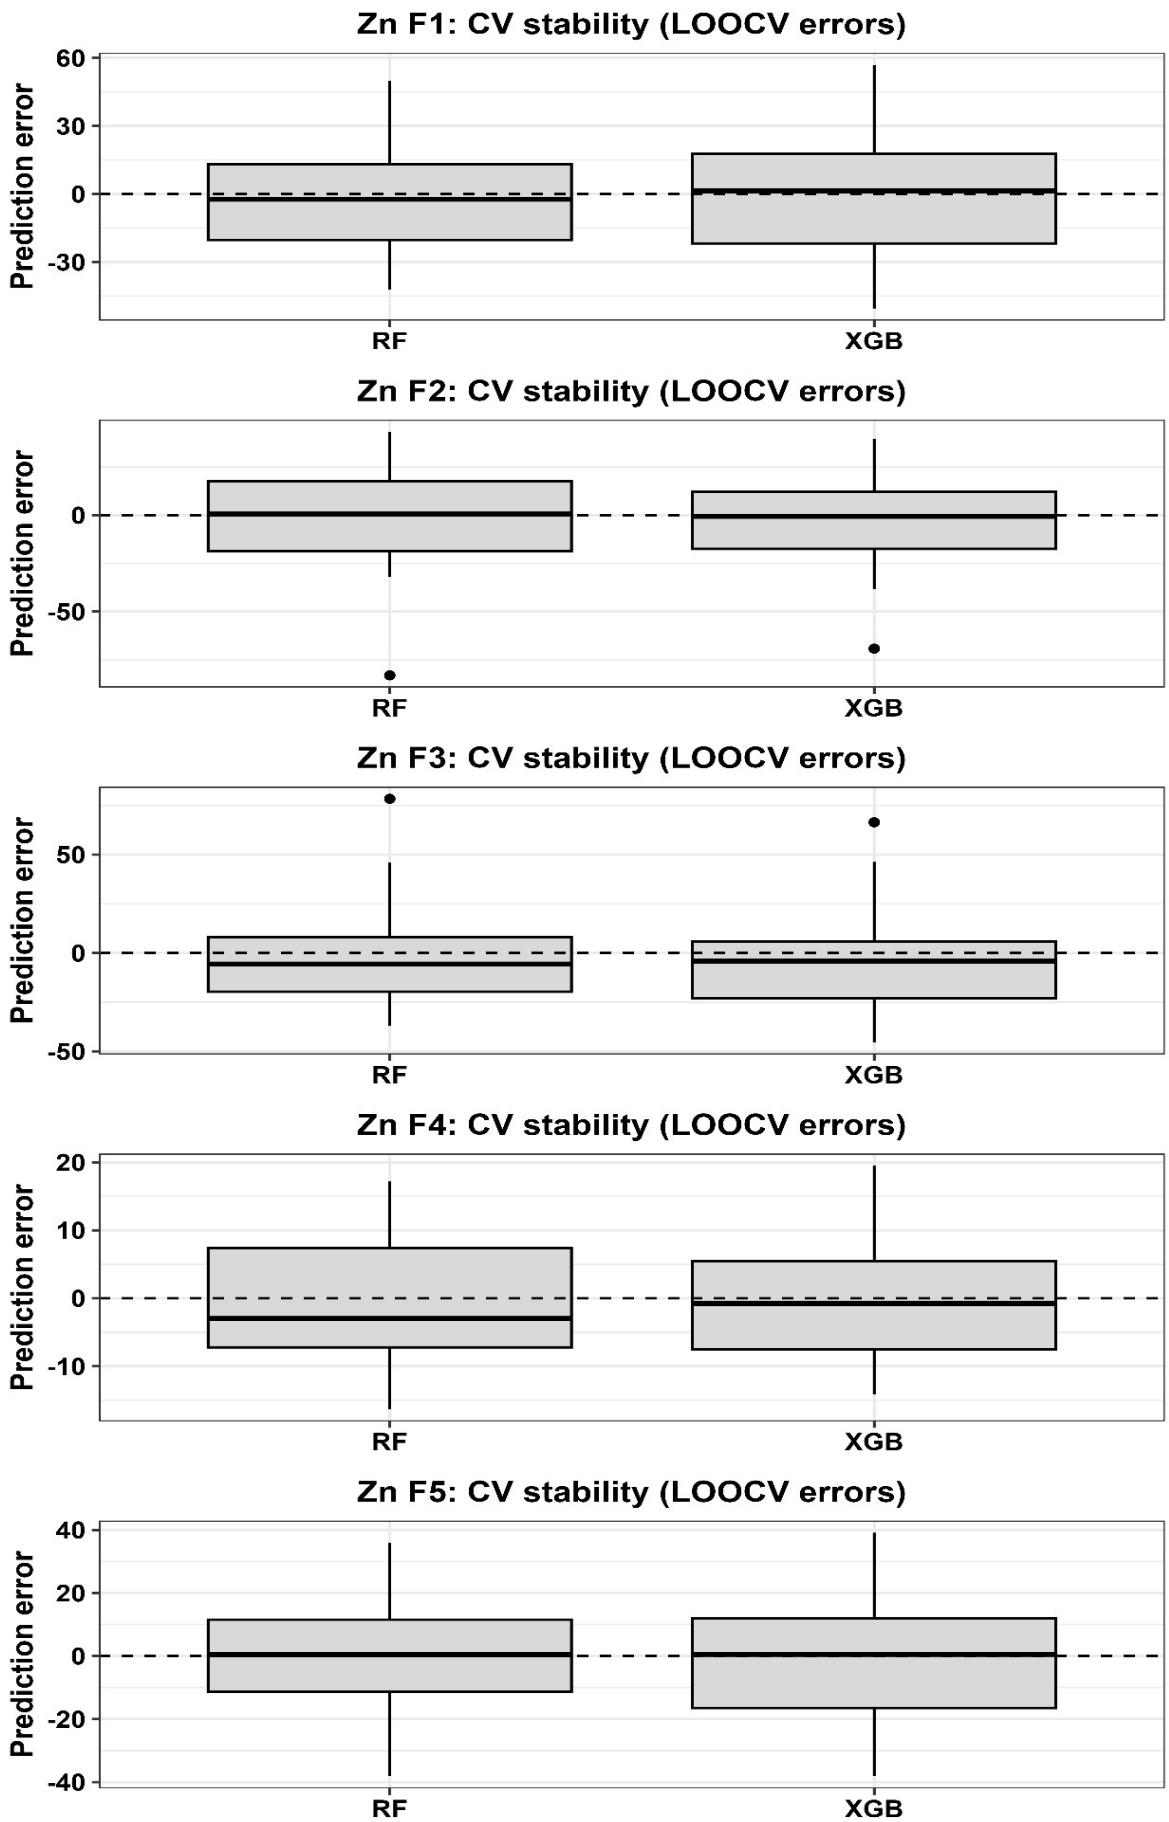

Figure S4. CV stability of Zn fractions (F1-F5)

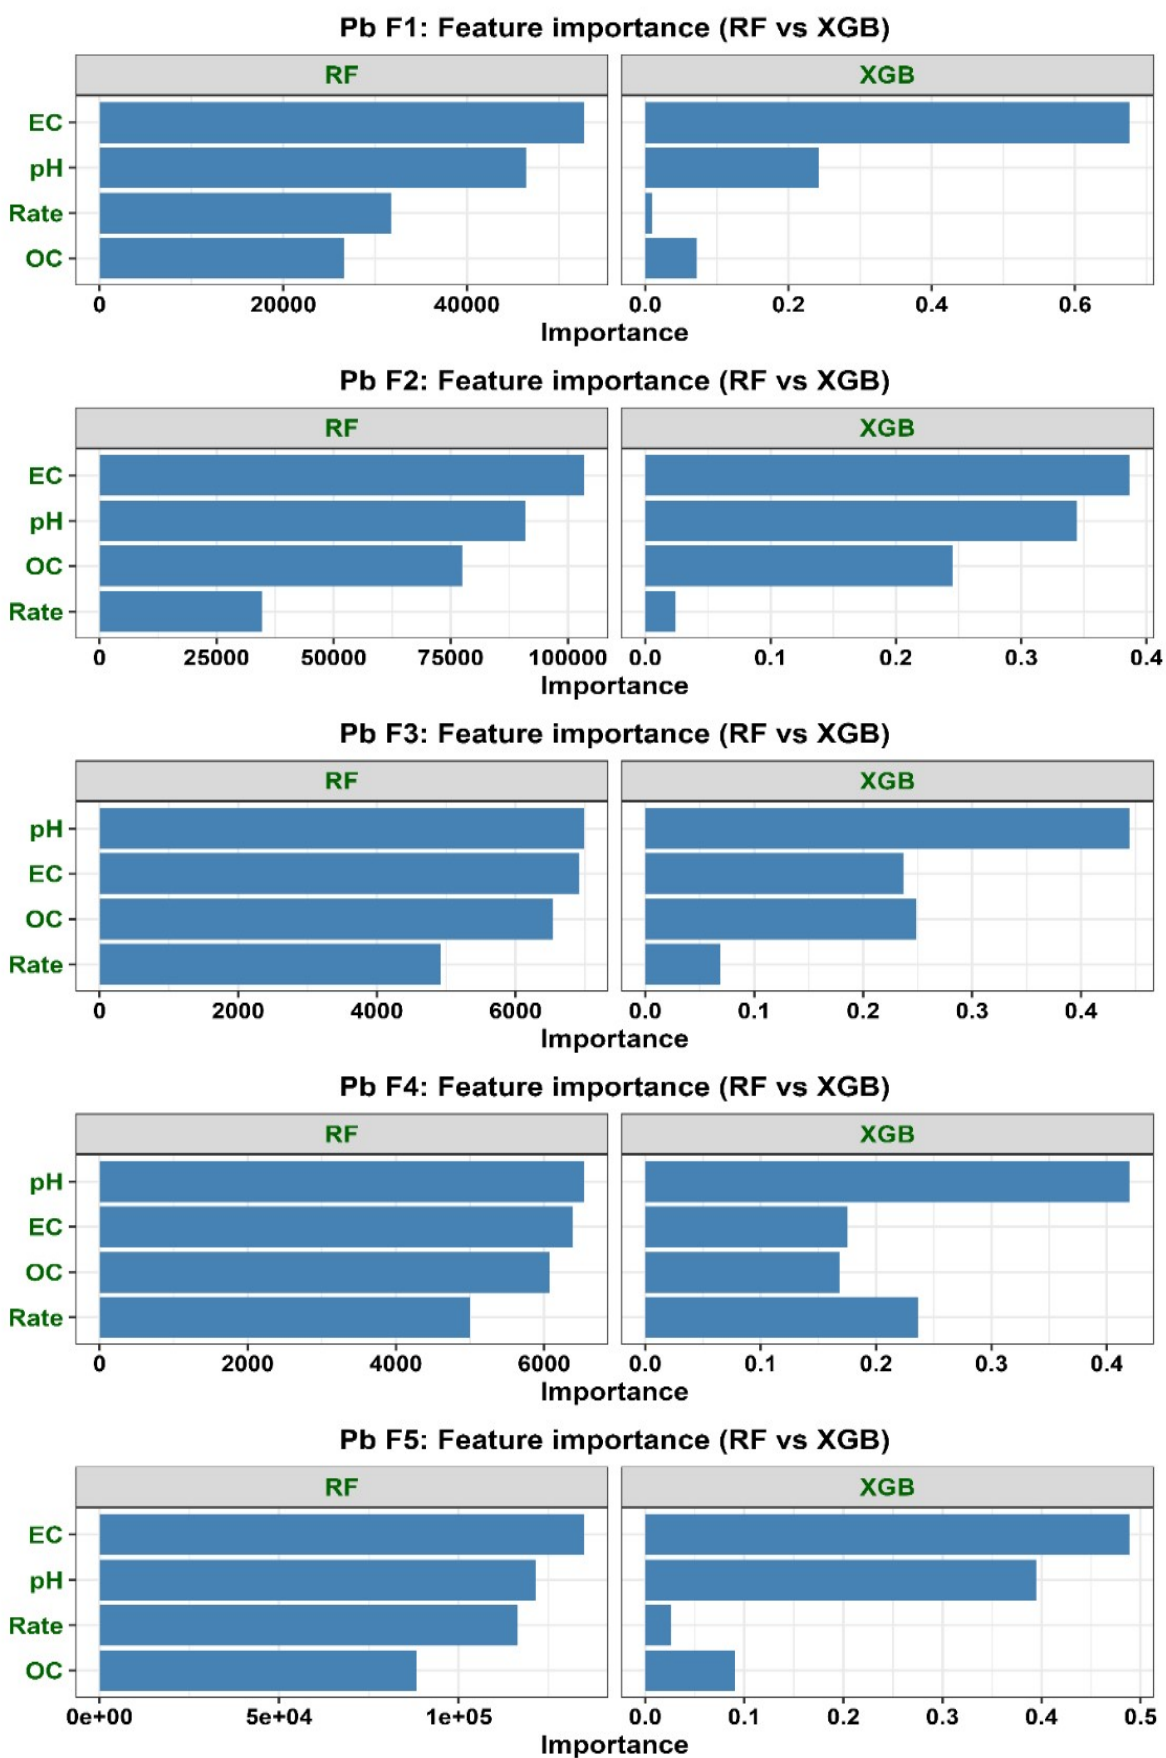

Figure S5. Importance of Pb fractions (F1-F5)

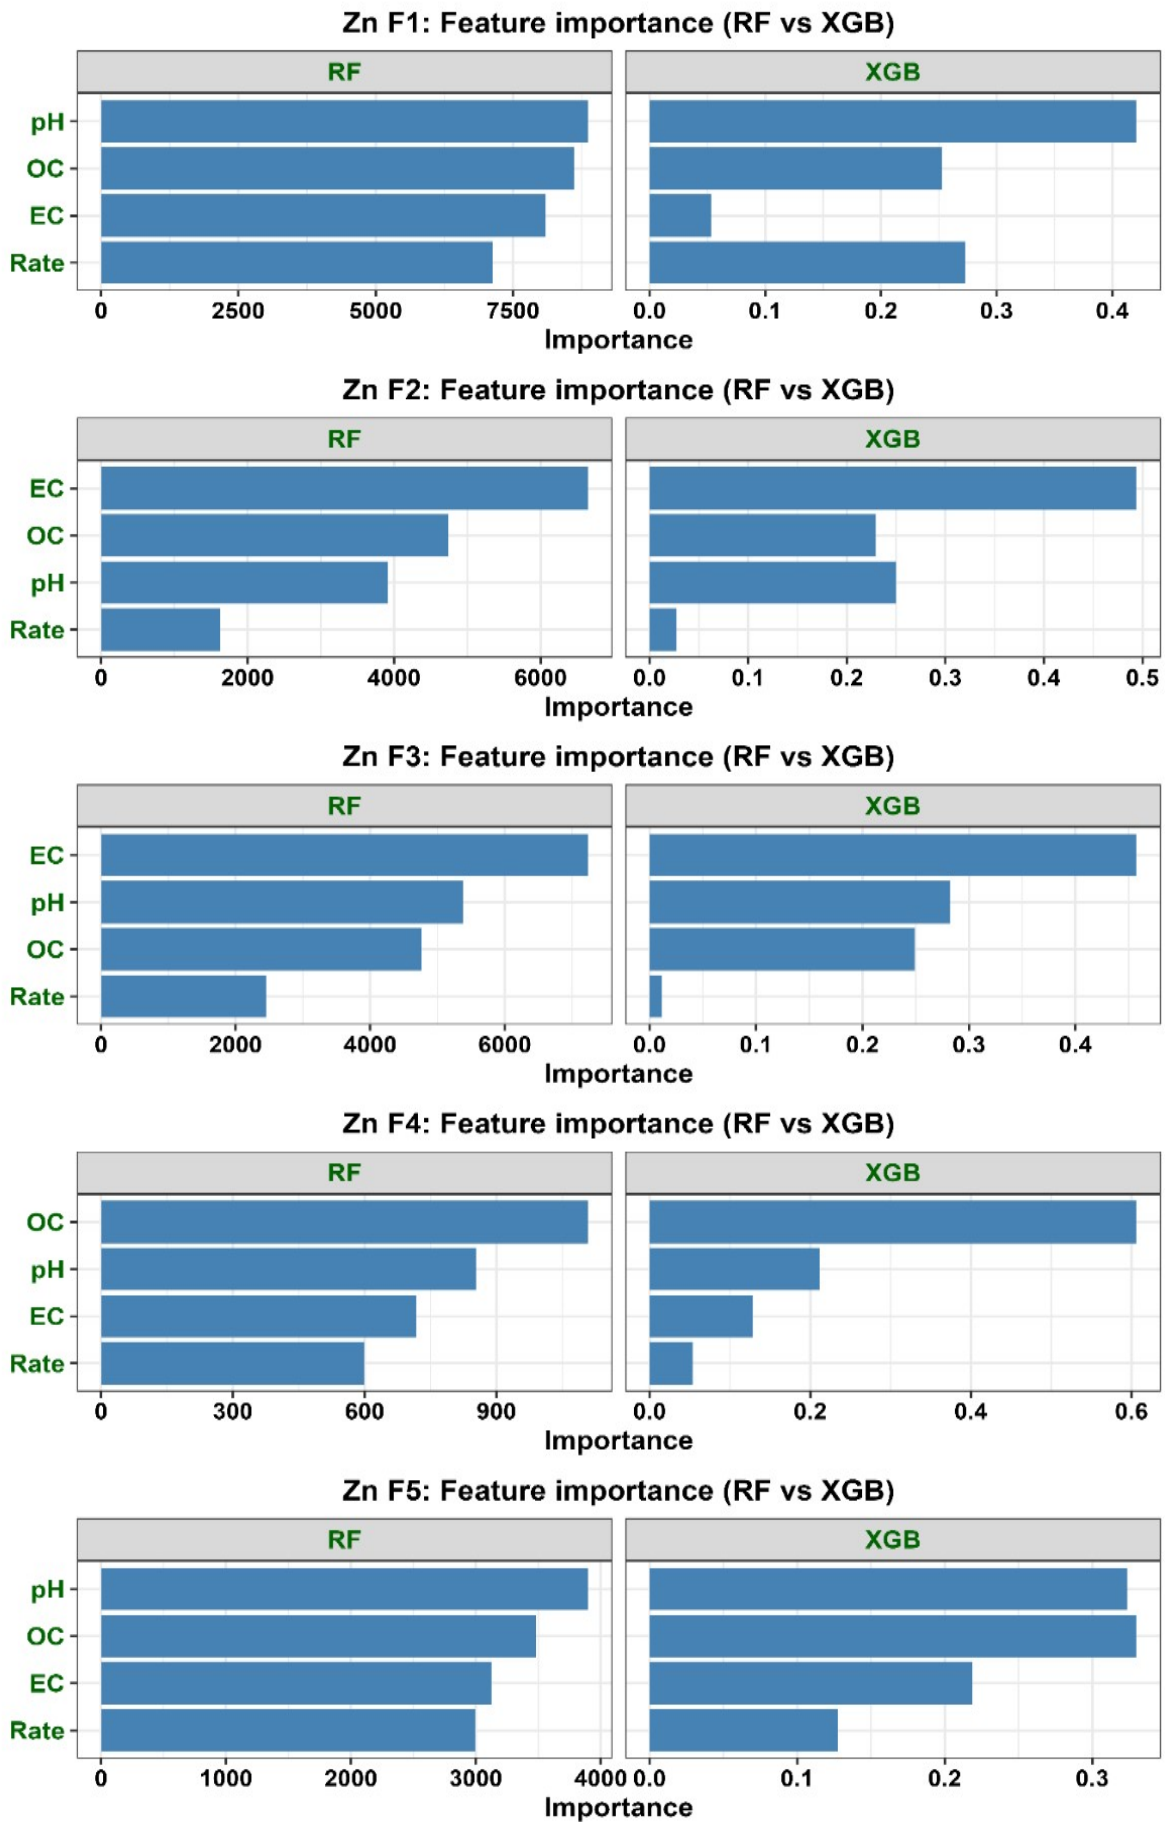

Figure S6. Importance of Zn fractions (F1-F5)
